# Supplementary material for: Representing the impact of Rhizophora mangroves on flow in a hydrodynamic model (COAWST_rh v1.0): the importance of three-dimensional root system structures
Source: Copernicus journal article supplement (doi:10.5194/gmd-16-5847-2023), 2023-10-19
Supplement: Supplementary file 1 [file gmd-16-5847-2023-supplement.pdf]

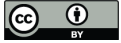

*Supplement of*

**Representing the impact of *Rhizophora* mangroves on flow in a hydrodynamic model (COAWST\_rh v1.0): the importance of three-dimensional root system structures**

**Masaya Yoshikai et al.**

*Correspondence to:* Masaya Yoshikai (yoshikai.masaya@gmail.com)

The copyright of individual parts of the supplement might differ from the article licence.

# 1 Supporting Information

## 2 S1. Vegetation module implemented by Beudin et al. (2017)

3 As in the main text, we describe the equations in the two-dimensional form ( $x$ - $z$  plane; zero  
4 velocity in  $y$ -direction) for convenience, while the equations implemented in ROM are three-  
5 dimensional; see Beudin et al. (2017) for the complete equations. The vegetation module  
6 implemented by Beudin et al. (2017) is for seagrasses/marshes that were represented by the  
7 cylinder drag model. They implemented the vegetation impacts not only on flows but also on  
8 wave damping. They also included additional functions of leaf bending considering the  
9 flexibility of submerged vegetations. Here we only describe the equations for impacts of rigid  
10 vegetation (no bending) on flow; these equations were used for comparison with the newly  
11 implemented drag and turbulence model for *Rhizophora* mangrove forests.

12 The drag by vegetation is calculated using the quadratic drag law as

$$13 \quad F_{veg}(z) = \frac{1}{2} C_D n_v b_v u(z)^2 \quad (S1)$$

14 where  $F_{veg}$  is the spatially-averaged vegetation drag ( $\text{m s}^{-2}$ ),  $z$  is the height from bed (m),  $C_D$   
15 is the drag coefficient,  $n_v$  is the number of plants (stems or leaves) per unit area ( $\text{m}^{-2}$ ),  $b_v$  is  
16 the stem or leaf width (m), and  $u$  is the flow velocity ( $\text{m s}^{-1}$ ).

17 The production of turbulence kinetic energy (TKE) by vegetation drag is expressed as

$$18 \quad P_w = F_{veg} u \quad (S2)$$

19 where  $P_w$  is the production of TKE by vegetation-generated wakes ( $\text{m}^2 \text{s}^{-3}$ ). The dissipation  
20 rate of wakes is expressed as

$$21 \quad D_w = c_2 \frac{P_w}{\tau_{eff}} = c_2 \frac{P_w}{\min(\tau_{free}, \tau_{veg})} \quad (S3)$$

22 where  $D_w$  is the wake dissipation rate ( $\text{m}^2 \text{s}^{-4}$ ),  $c_2$  (1.92) is the constant of the  $k$ - $\epsilon$  model, and  
23  $\tau_{eff}$  (s) are the effective time-scale of wakes, which takes the minimum of time-scale of free  
24 turbulence ( $\tau_{free}$ ) and time-scale regulated by spaces between the nearest-neighbor plants  
25 ( $\tau_{veg}$ ). These are described as

$$26 \quad \tau_{free} = \frac{k}{\epsilon} \quad (S4a)$$

$$27 \quad \tau_{veg} = \left( \frac{L^2}{c_w^2 P_w} \right)^{1/3} = \left( \frac{s^2}{c_w^2 P_w} \right)^{1/3} \quad (S4b)$$

28 where  $k$  is the TKE ( $\text{m}^2 \text{s}^{-2}$ ),  $\varepsilon$  is the turbulent dissipation ( $\text{m}^2 \text{s}^{-3}$ ),  $c_w$  is the model constant,  
 29 which was set as 0.09 in Beudin et al. (2017), and  $L$  (m) is the length-scale of wakes, which  
 30 was set as the mean spacing of nearest-neighbor plants (s) in Beudin et al. (2017) where  $s$  is  
 31 calculated from the density, width, and thickness of stem/leaf.

## 32 S2. Minor modifications of $k$ - $\varepsilon$ model introduced by Beudin et 33 al. (2017)

34 In Beudin et al. (2017), the time-scale of wakes ( $\tau_{eff}$ ) was defined by the minimum of  $\tau_{free}$  and  
 35  $\tau_{veg}$  as described in Eq. (S3) in Sect. S1. However, we noticed the minimum function used for  
 36  $\tau_{eff}$  yields complicated results. This may be because of the interactive feedback between  $\tau_{free}$   
 37 and  $\tau_{veg}$ , such that a case of  $\tau_{eff} = \tau_{veg}$  in Eq. (S3) at one moment affects  $\tau_{free}$  at the next moment  
 38 through the equations for  $k$  (Eq. 2) and  $\varepsilon$  (Eq. 3); these in turn will affect  $\tau_{eff}$  in Eq. (S3). As a  
 39 result, the original model by Beudin et al. (2017) predicted TKE significantly smaller than the  
 40 model predictions using the time-scale set as either of  $\tau_{free}$  and  $\tau_{veg}$ , which are difficult to  
 41 interpret (results not shown). This minimum function for the time-scale of wake turbulence has  
 42 not been well supported by previous theoretical and experimental works. As such, we avoided  
 43 the use of the minimum function for  $\tau_{eff}$  in our analysis.

44 The use of  $\tau_{free}$  for  $\tau_{eff}$  corresponds to the time-scale used such as in López and García (2001),  
 45 Defina and Bixio (2005), and Baptist et al. (2007). However, King et al. (2012) and Liu et al.  
 46 (2017) found that the use of  $\tau_{veg}$  for  $\tau_{eff}$ , which explicitly specifies the length-scale of wakes ( $L$   
 47 in Eq. S4b), would produce much better results than the use of  $\tau_{free}$  for  $\tau_{eff}$ .

48 For  $\tau_{veg}$ , the use of  $s$  for the length-scale,  $L$ , in Eq. (S4b) inherently assumes the conditions  $s$   
 49  $< d$ , where  $d$  is the cylinder diameter, which is equal to  $b_v$  for the seagrasses/marshes, where  
 50 otherwise  $d$  should be applied for  $L$  (Tanino and Nepf, 2008; Nepf, 2012). In our analysis  
 51 performed in the main text, the cylinder approximations (Fig. 3) did not satisfy the conditions  
 52  $s < d$ , thus the  $d (= b_v)$  would be appropriate for  $L$ .

53 Based on these, we modified Eqs. (S3–4) as

$$54 \quad D_w = c_2 \frac{P_w}{\tau_{veg}} \quad (S5)$$

$$55 \quad \tau_{veg} = \left( \frac{L^2}{c_w^2 P_w} \right)^{1/3} = \left( \frac{b_v^2}{c_w^2 P_w} \right)^{1/3} \quad (S6)$$

56 These modified equations were used for the model analysis using the cylinder array  
 57 approximations in the main text.

### 58 S3. *Rhizophora* root model

59 The vertical profile of root projected area density ( $a_{root}$ ) was computed using the empirical  
60 model for *Rhizophora* root structures (*Rh*-root model) proposed by Yoshikai et al. (2021); the  
61 procedure is summarized below.

62 The model was designed to predict the structure of the individual root system. It predicts the  
63 vertical profile of the number of roots of a tree using two parameters— $S$  (scaling factor) and  
64  $HR_{max}$  (maximum root height). The  $S$  and  $HR_{max}$  are strongly related to tree size represented  
65 by the stem diameter measured at 1.3-m height ( $D_{stem}$ ). The  $k^{\text{th}}$  highest root in a root system  
66 can be then expressed as

$$67 \quad HR_k = HR_{max} S^{(k-1)} \geq HR_{min} \quad (S7a)$$

$$68 \quad S = 1 - \beta_S D_{stem,i}^{\alpha_S} \quad (S7b)$$

$$69 \quad HR_{max} = \alpha_{HR} D_{stem,i} + \beta_{HR} \quad (S7c)$$

70 where  $HR_{min}$  in Eq. (S7a) is a model parameter (critical root height) that limits the minimum  
71 root height of a tree,  $D_{stem,i}$  is the stem diameter (m) where the subscript “ $i$ ” represents tree  
72 index, and  $\alpha_S$ ,  $\beta_S$ ,  $\alpha_{HR}$ ,  $\beta_{HR}$  are the scaling parameters for  $S$  and  $HR_{max}$ , respectively. The  $\alpha_S$ ,  
73  $\beta_S$ ,  $\alpha_{HR}$ ,  $\beta_{HR}$  are considered site- and species-specific parameters, thus the values need to be  
74 derived through a field survey. See Yoshikai et al. (2021) or (2022a) for the procedure to obtain  
75 these parameter values in the field with reduced workload. The value of  $HR_{min}$  also needs to  
76 be determined for a site through a field survey.

77 From Eq. (S7), the heights of all roots of a tree can be predicted. Yoshikai et al. (2022a)  
78 suggested that the individual roots can be approximated as a linear shape to estimate the  
79 projected area of roots. The linear shape of a root projected from the direction along the  $x$ -  
80 axis can be expressed as

$$81 \quad z = (\tan\theta_l) \left( \frac{y}{\cos\psi} \right) + HR \quad \text{where } 0 < z < HR \quad (S8)$$

82 where  $y$  and  $z$  represent the horizontal and vertical coordinate of a point, where  $y = 0$  at the  
83 location where a root emerges from the stem or another root and  $z = 0$  at the ground,  $HR$  is  
84 the height of a root (m),  $\theta_l$  is the angle of the approximated linear shape relative to the  
85 horizontal axis, and  $\psi$  is the azimuth root angle around the  $z$ -axis relative to the  $x$ -axis. The  
86 value of  $\theta_l$  was empirically determined in Yoshikai et al. (2022a). The projected area of a root  
87 can be calculated by multiplying the root length provided by Eq. (S8) and the mean root  
88 diameter ( $D_{root,ave}$ ). Then, by summing up the projected areas of all the roots per vertical height

89 interval,  $dz$  (0.05 m in this study), the vertical profile of root projected area per  $dz$  of a tree “ $i$ ”  
90 ( $A_{root,i}(z)$  ( $m^2$ )) can be calculated. Here, because the root azimuth angle in Eq. (8),  $\psi$ , is  
91 unknown, Yoshikai et al. (2022a) employed random numbers to  $\psi$  and estimated  $A_{root,i}$  from  
92 the ensemble approach. Based on the ensemble computations, we found that the  $A_{root,i}$   
93 computed using random numbers for  $\psi$  is approximately 80 % of the  $A_{root,i}$  computed using the  
94 zero value for  $\psi$  for all the roots, which is referred to as  $A_{root0,i}$  below. Hence, we calculated  
95 the  $A_{root,i}$  as

$$96 \quad A_{root,i}(z) = 0.8 \times A_{root0,i}(z) \quad (S9)$$

97 where the multiplication by 0.8 represents the effects of random azimuth angle on the  
98 projected area. This approach (Eq. S9) does not require the ensemble approach to estimate  
99  $A_{root,i}$ , which is convenient for implementation to the numerical model.

## 100 S4. Tree census data

101 We used tree census data collected from three sites—two from Bakhawan Ecopark, Aklan,  
102 Philippines (11° 43' N, 122° 23' E; Suwa et al., unpublished data), and one from Fukido River  
103 mangrove forest, Ishigaki, Japan (24° 20' N, 124° 15' E; Suwa et al., 2021)—to investigate the  
104 validity of the proposed parameterization of tree size variations (see Section 2.1.3). We refer  
105 to the two sites of Bakhawan Ecopark as Bak1 and Bak2, respectively, and Fukido River  
106 mangrove forest as Fuk.

107 The sites Bak1 and Bak2 are 30-year-old and 17-year-old planted stands, respectively, of  
108 *Rhizophora apiculata*; Bak2 includes the site where the vegetation and hydrodynamic data  
109 were collected by Yoshikai et al. (2022a), which were used for model evaluation in this study.

110 The site Fuk is a natural mangrove forest vegetated by *Rhizophora stylosa* and *Buruguiera*  
111 *gymnorhiza*. Along with the soil salinity gradient, a notable change in the forest structural  
112 variables (stem diameter, tree height, species composition) was observed at this forest  
113 (Yoshikai et al., 2022b). As described in Suwa et al. (2021), a 7-m radius circular plot was  
114 established and the stem diameter at 1.3-m height ( $D_{stem}$ ) was measured for all the trees. The  
115 number of plots for the tree census is 6 for Bak1, 6 for Bak2, and 15 for Fuk, respectively. We  
116 did not use the data of 10 plots out of a total of 24 plots in Fuk collected in Suwa et al. (2021)  
117 because of the absence of *R. stylosa* trees.

118 The root structures of *R. apiculata* and *R. stylosa* at these three sites were investigated in  
119 Yoshikai et al. (2021) and the values of the *Rh*-root model parameters were derived (Table  
120 S1). These parameter values were used for the computation of the vertical profile of root

121 projected area per  $dz$  of a tree,  $A_{root,i}(z)$ , for each site using the  $Rh$ -root model; these are shown  
 122 in Fig. 2.

123 Table S1. *Rhizophora* root model parameters for three tree census sites.

| Parameter                                                         | Bak1               | Bak2         | Fuk               |
|-------------------------------------------------------------------|--------------------|--------------|-------------------|
| Scaling parameter for $S$ ( $\alpha_S$ )                          | -0.91              | -2.04        | -1.76             |
| Scaling parameter for $S$ ( $\beta_S$ )                           | $10^{-2.00}$       | $10^{-3.59}$ | $10^{-3.18}$      |
| Scaling parameter for $S$ ( $\alpha_{HR}$ )                       | 2.06               | 15.38        | 2.71              |
| Scaling parameter for $S$ ( $\beta_{HR}$ )                        | 0.82               | 0.08         | 0.50              |
| Critical root height ( $HR_{min}$ , m)                            | 0.01 <sup>a</sup>  | 0.01         | 0.01 <sup>a</sup> |
| Root angle of approximated linear root shape ( $\theta$ , degree) | -34.5 <sup>a</sup> | -34.5        | -41.9             |
| Mean root diameter ( $D_{root,ave}$ , m)                          | 0.03 <sup>a</sup>  | 0.03         | 0.03              |

124 <sup>a</sup> Value determined for Bak2 was used.

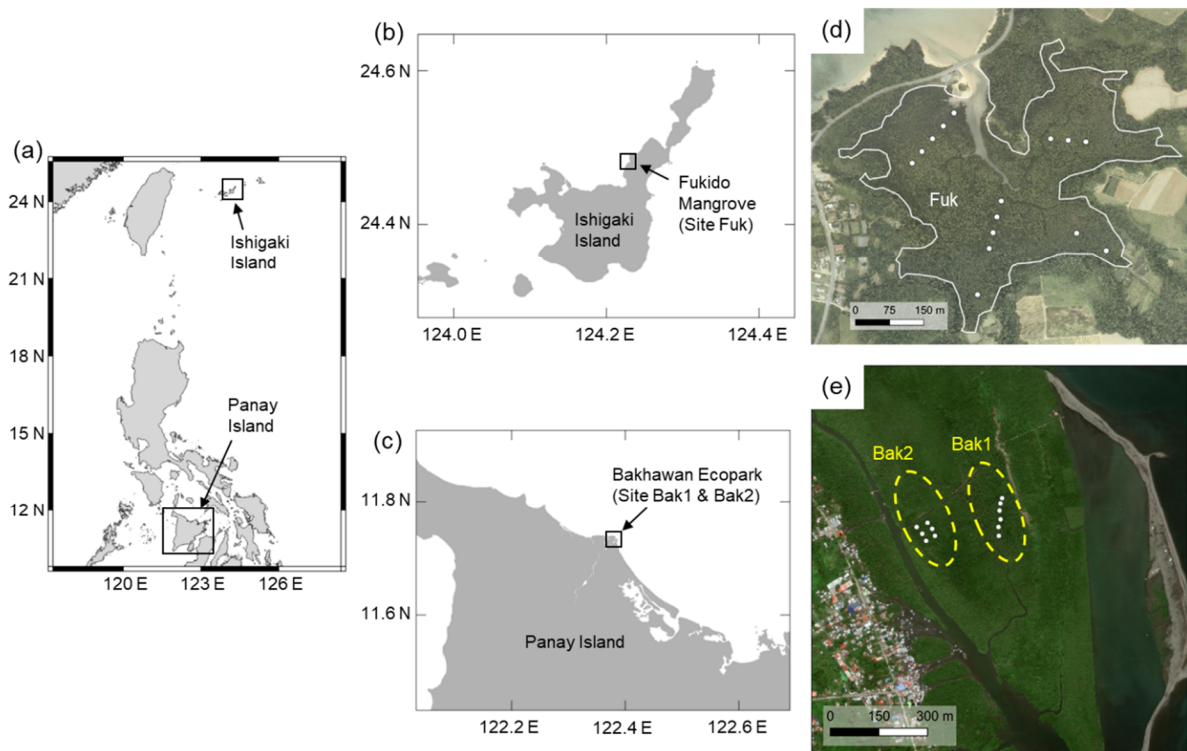

125  
 126 Figure S1. Map of the sites (Bak1, Bak2, and Fuk) indicated in Fig. 2. The white dots in panels  
 127 “d” and “e” represent the tree census stations from which data are used in Fig. 2. In panel “e”,  
 128 the approximate locations of the 30-year-old (Bak1) and 17-year-old (Bak2) planted stands

129 are also indicated. Shorelines in panel “a–c” are from the Global Self-consistent, Hierarchical,  
 130 High-resolution Geography (GSHHG) database. The aerial photo in panel “d” is from Asia Air  
 131 Survey Co. Ltd., Japan, and the satellite image in panel “e” is from © Google Earth.

## 132 S5. Implementation of the new model to the COAWST

133 We replaced the equations for drag force and turbulence introduced by Beudin et al. (2017)  
 134 with the ones presented in Sections 2.1.1–2.1.2 (Eqs. (1)–(6)) in the COAWST. The  
 135 *Rhizophora* root module that gives  $a_{root}(z)$  from  $n_{tree}$  and  $D_{stem,ave}$  using the *Rh*-root model was  
 136 newly added in the COAWST (Fig. 1). Table S2 shows the grid-explicit input parameters  
 137 related to this study. Parameters related to root structures are inputted to the model as  
 138 universal parameters (not grid-explicit; Table S1). We introduced a new input parameter,  
 139 species index ( $spe$ ), that identifies the vegetation as *Rhizophora* species ( $spe = 1$ ) or  
 140 seagrass/marsh species ( $spe = 0$ ). Depending on  $spe$ , the model interpretation of the inputted  
 141 parameters varies (Table S2). If  $spe = 1$ , the vegetation module interacts with the *Rhizophora*  
 142 root module for  $a_{root}$  (Fig. 1) to compute the drag by the roots ( $F_{root}$  in Eq. (1)) and the TKE  
 143 production and dissipation of the root-generated wakes ( $P_{w,root}$  and  $D_{w,root}$  in Eqs. (4)–(6)).  
 144 Otherwise ( $spe = 0$ ), zero value is given to  $a_{root}$ , which vanishes all the root-related terms in  
 145 Eqs. (1), (4)–(6), making them identical to the ones introduced by Beudin et al. (2017) and  
 146 thus applying the cylinder drag model (however, see Sect. S2 for the modification of the  
 147 equations of Beudin et al. (2017)). This means that the equations presented can be used both  
 148 for *Rhizophora* mangroves and seagrasses/marshes by switching the value of  $spe$ .

149 Table S2. Grid-explicit input parameters. Symbols used in Beudin et al. (2017) are also shown.  
 150 Parameters absent in the column of Beudin et al. (2017) are the ones newly added in this  
 151 study. Mean tree height ( $H_{ave}$ ) is only relevant for some extreme conditions when the water  
 152 level becomes higher than  $H_{ave}$ .

| Symbol         |                      | Unit            | Interpretation by the model |                             |
|----------------|----------------------|-----------------|-----------------------------|-----------------------------|
| This study     | Beudin et al. (2017) |                 | Case $spe = 1$              | Case $spe = 0$              |
| $spe$          |                      | -               | <i>Rhizophora</i> species   | Seagrass/marsh              |
| $D_{stem,ave}$ | $b_v$                | m               | Mean stem diameter          | Leaf width or stem diameter |
| $n_{ree}$      | $n_v$                | m <sup>-2</sup> | Tree density                | Leaf or stem density        |
| $H_{ave}$      | $l_v$                | m               | Mean tree height            | Leaf or stem length         |

153 **S6. Generic mangrove root model used in Xie et al. (2020)**

154 We examined the use of the mangrove root model used in Xie et al. (2020) (termed as generic  
 155 root model in the main text) as a predictor of  $a_{root}$  in Eq. (1). In Xie et al. (2020), the shape of  
 156 roots was simplified to cylindrical objects with a fixed diameter and height, hence to the array  
 157 of vertical cylinders. The number of roots of a tree is given by the function of stem diameter  
 158 as:

$$159 \quad n_{root,ind} = n_{root,max} \frac{1}{1 + \exp\left[f_{root}\left(\frac{D_{stem,max}}{2} - D_{stem}\right) \times 100\right]} \quad (S10)$$

160 where  $n_{root,ind}$  is the number of roots of a tree having a stem diameter of  $D_{stem}$  (m),  $n_{root,max}$  is  
 161 the maximum number of roots of a tree,  $f_{root} = 0.1$  is a constant describing the rate of increase  
 162 of roots with  $D_{stem}$ ,  $D_{stem,max}$  is the maximum stem diameter (m), and the factor 100 is for the  
 163 unit conversion of stem diameter from meter to centimeter. In Xie et al. (2020), the parameters  
 164 are set as  $n_{root,max} = 5000$ ,  $D_{stem,max} = 1.0$  (m) for *Rhizophora* trees. In addition, Xie et al. (2020)  
 165 gave the root diameter ( $D_{root}$ ) and height ( $H_{root}$ ) values as  $D_{root} = 0.01$  m and  $H_{root} = 0.15$  m,  
 166 respectively.

167 We applied the generic root model to the field mangrove setting of Bakhawan Ecopark. We  
 168 used the measured mean stem diameter  $D_{stem,ave} = 0.066$  m (Table 1) for  $D_{stem}$  in Eq. (S10),  
 169 then calculated the  $n_{root,ind}$  with the same parameter setting as Xie et al. (2020). The  $a_{root}$ , which  
 170 is used for calculating the drag by the roots in Eq. (1), is then given as:

$$171 \quad a_{root} = n_{tree} n_{root,ind} D_{root} \quad \text{for } z \leq H_{root} \quad (S11a)$$

$$172 \quad a_{root} = 0 \quad \text{for } z > H_{root} \quad (S11b)$$

173 **S7. Calculation of bed shear stress in the COAWST and the**  
 174 **choice of bed roughness value for the case of increased  $z_0$**

175 In the COAWST, bed shear stress is computed based on quadratic law using the velocities at  
 176 the bottom computational cell as (Warner et al., 2008):

$$177 \quad \tau_{bed} = \rho_w C_{bed} u^2 \quad (S12)$$

178 where  $\tau_{bed}$  is the bed shear stress ( $\text{N m}^{-2}$ ),  $\rho_w$  is the water density ( $\text{kg m}^{-3}$ ),  $C_{bed}$  is the bed drag  
 179 coefficient, and  $u$  is the flow velocity ( $\text{m s}^{-1}$ ) computed at the bottom cell. It assumes that the  
 180 flow in the bottom boundary layer has the classic vertical logarithmic profile as:

$$181 \quad |u| = \frac{u_*}{\kappa} \ln\left(\frac{z_{bottom}}{z_0}\right) \quad (S13)$$



182 where  $u^*$  is the friction velocity,  $\sqrt{\tau_{bed}}$ ,  $\kappa = 0.41$  is the von Kármán constant,  $z_{bottom}$  is the  
 183 elevation of the middle point of the bottom computational cell above the bed (m), and  $z_0$  is the  
 184 bed roughness length (m). From Eqs. (S12)–(S13), the  $C_{bed}$  is calculated using  $z_0$  as:

$$185 \quad C_{bed} = \kappa^2 \left[ \ln \left( \frac{z_{bottom}}{z_0} \right) \right]^{-2} \quad (S14)$$

186 The value of  $z_0$  or  $C_{bed}$  can be related to the Manning's coefficient ( $n_{manning}$ ) considering  
 187 turbulent open channel flow as follows. In an open channel flow with depth-averaged velocity  
 188  $U_{mean}$ , water depth  $h$ , and bed slope  $S_0$ , the  $U_{mean}$  can be described using the Manning's  
 189 coefficient as:

$$190 \quad U_{mean} = \frac{1}{n_{manning}} h^{2/3} S_0^{1/2} \quad (S15)$$

191 Assuming a steady flow where the momentum balance can be reduced to an equilibrium  
 192 between the bed shear stress  $\tau_{bed}$  and the gravitational (or pressure) forces driving the flow,  
 193 the bed shear stress can be expressed as (Crompton et al., 2020):

$$194 \quad \tau_{bed} = \rho_w g h S_0 \quad (S16)$$

195 where  $g$  is the gravitational acceleration ( $\text{m s}^{-2}$ ). From Eq. (S15)–(S16) and assuming that the  
 196 depth-averaged form of Eq. (S12),  $\tau_{bed} = \rho_w C_{bed,mean} U_{mean}^2$ , is valid, the Manning's coefficient  
 197 can be expressed as:

$$198 \quad n_{manning} = h^{1/6} \sqrt{\frac{C_{bed,mean}}{g}} \quad (S17)$$

199 where  $C_{bed,mean}$  is the bed drag coefficient which is used for computing  $\tau_{bed}$  using the  $U_{mean}$ .  
 200 Also, by relating the depth-averaged form of Eq. (S14),  $C_{bed,mean}$  can be expressed using  $z_0$  as  
 201 (Lenz et al., 2017):

$$202 \quad C_{bed,mean} = \kappa^2 \left[ \ln \left( \frac{h}{z_0} \right) \right]^{-2} \quad (S18)$$

203 Considering the Manning's coefficient of 0.14, which is a value typically used for approximating  
 204 the drag by mangroves (e.g., Zhang et al., 2012), and a water depth of 0.5 m, based on Eqs.  
 205 (S17)–(S18), the equivalent bed roughness  $z_0$  is 0.22 m.

206 The application of Eqs. (12)–(14) needs the condition  $z_0 < z_{bottom}$ , which limits the applicable  
 207  $z_0$  value for representing the mangrove drag depending on the water depth or thickness of the  
 208 bottom cell. In the application to the field-based study, the lowest water depth for examination  
 209 was around 0.15 m (Fig. 6; Table S6), where the  $z_{bottom}$  is decreased down to 0.015 m. In order  
 210 to increase the applicable  $z_0$  value in our analysis, we reduced the number of vertical layers

211 from 5 to 3 (Table 2), which increased the minimum  $z_{bottom}$  up to 0.025 m. We then conducted  
 212 the analysis using  $z_0 = 0.02$  m as a case of increased  $z_0$ . However, this value is considered  
 213 generally lower compared to the typical Manning's coefficient value of 0.14 (of which the  
 214 equivalent value is  $z_0 = 0.22$  m under the water depth 0.5 m).

215 Table S3. Measured flow variables in the model and field mangrove forest by Maza et al.  
 216 (2017) and Yoshikai et al. (2022a), respectively, the variables controlled in the model, and  
 217 target variables to reproduce for application to the respective mangrove forest.

|                                      | Model mangrove forest<br>in Maza et al. (2017) | Field mangrove forest in<br>Yoshikai et al. (2022a) |
|--------------------------------------|------------------------------------------------|-----------------------------------------------------|
| Measured flow variables              | $h, U, u(z), k(z)$                             | $h, \Delta\eta, u(z), U, \tau_{bed}$                |
| Controlled variables in the<br>model | $h, U$                                         | $h, \Delta\eta$                                     |
| Target variables to reproduce        | $u(z), k(z)$                                   | $u(z), U, \tau_{bed}$                               |

218 Table S4. Data from the flume experiments of Maza et al. (2017) that were used for the model  
 219 validation in Figure 4. The values of geometric and flow parameters were converted from the  
 220 scale in the flume to the real scale. The velocity ( $u$ ) and turbulent kinetic energy ( $k$ ) were taken  
 221 by averaging the measurements at five lateral positions (ADV3p1–p5; see Fig. 5 of Maza et  
 222 al., 2017) in the model mangrove forest where the flows were fully developed, which were  
 223 taken as spatially-averaged values in the mangrove forest.  $HR_{max}$ : maximum root height,  $h$ :  
 224 water depth,  $U$ : cross-sectional mean velocity,  $z$ : height above the bed.

| Experiment # | $HR_{max}$ (m) | $h$ (m) | $U$ (m s <sup>-1</sup> ) | $z$ (m) | $u/U$ | $k/U^2$ |
|--------------|----------------|---------|--------------------------|---------|-------|---------|
| Exp 1        | 2.016          | 3.0     | 0.31                     | 0.08    | 0.54  | 0.012   |
|              |                |         |                          | 0.32    | 0.62  | 0.013   |
|              |                |         |                          | 0.56    | 0.66  | 0.015   |
|              |                |         |                          | 0.80    | 0.64  | 0.032   |
|              |                |         |                          | 1.04    | 0.69  | 0.026   |
|              |                |         |                          | 1.28    | 0.75  | 0.024   |
|              |                |         |                          | 1.52    | 0.84  | 0.053   |
|              |                |         |                          | 1.76    | 0.97  | 0.035   |
|              |                |         |                          | 2.00    | 1.05  | 0.033   |
|              |                |         |                          | 2.24    | 1.10  | 0.043   |
| Exp 2        | 2.016          | 1.79    | 0.58                     | 0.08    | 0.75  | 0.018   |
|              |                |         |                          | 0.20    | 0.77  | 0.021   |
|              |                |         |                          | 0.32    | 0.80  | 0.017   |
|              |                |         |                          | 0.44    | 0.84  | 0.016   |
|              |                |         |                          | 0.56    | 0.83  | 0.021   |
|              |                |         |                          | 0.68    | 0.83  | 0.026   |
|              |                |         |                          | 0.80    | 0.86  | 0.023   |
|              |                |         |                          | 0.92    | 0.85  | 0.023   |

225 Table S5. Data from field measurements of Yoshikai et al. (2022a) that were used for the  
 226 model validation in Figure 5. Velocity ( $u$ ) was obtained by averaging the measurements at four  
 227 locations around the reference tree shown in Fig. S3c which was taken as spatially-averaged  
 228 values in the mangrove forest.

| Local time      | $h$ (m) | $z$ (m) | $u$ (m s <sup>-1</sup> ) |
|-----------------|---------|---------|--------------------------|
| 2018/9/10 12:50 | 0.45    | 0.35    | 0.060                    |
|                 |         | 0.30    | 0.064                    |
|                 |         | 0.25    | 0.060                    |
|                 |         | 0.20    | 0.057                    |
|                 |         | 0.15    | 0.055                    |
|                 |         | 0.10    | 0.044                    |
|                 |         | 0.05    | 0.036                    |
| 2018/9/10 13:40 | 0.21    | 0.18    | 0.096                    |
|                 |         | 0.11    | 0.082                    |
|                 |         | 0.04    | 0.059                    |
| 2018/9/11 13:00 | 0.53    | 0.45    | 0.046                    |
|                 |         | 0.40    | 0.039                    |
|                 |         | 0.35    | 0.045                    |
|                 |         | 0.30    | 0.044                    |
|                 |         | 0.25    | 0.044                    |
|                 |         | 0.20    | 0.041                    |
|                 |         | 0.15    | 0.034                    |
|                 |         | 0.10    | 0.028                    |
| 2018/9/11 14:00 | 0.28    | 0.23    | 0.085                    |
|                 |         | 0.14    | 0.072                    |
|                 |         | 0.05    | 0.052                    |

229 Table S6. Data from field measurements of Yoshikai et al. (2022a) that were used for the  
 230 model forcing and validation in Figures 6–8. The  $\Delta\eta$  is the water level difference imposed  
 231 across the open boundaries in the model (see Fig. S2),  $h$  is the water depth,  $U$  is the cross-  
 232 sectional mean flow velocity,  $u_{bottom}$  is the spatially-averaged velocity at  $z = 0.05$  m, and  $\tau_{bed}$  is  
 233 the bed shear stress.

| Local time       | $\Delta\eta$ (m) | $h$ (m) | $U$ (m s <sup>-1</sup> ) | $u_{bottom}$ (m s <sup>-1</sup> ) | $\tau_{bed}$ (N m <sup>-2</sup> ) |
|------------------|------------------|---------|--------------------------|-----------------------------------|-----------------------------------|
| 2018/09/10 12:50 | 0.0143           | 0.45    | 0.050                    | 0.036                             | 0.023                             |
| 2018/09/10 13:10 | 0.0189           | 0.36    | 0.063                    | 0.036                             | 0.039                             |
| 2018/09/10 13:20 | 0.0273           | 0.32    | 0.064                    | 0.041                             | 0.032                             |
| 2018/09/10 13:40 | 0.0462           | 0.21    | 0.079                    | 0.064                             | 0.023                             |
| 2018/09/10 13:50 | 0.0572           | 0.16    | 0.074                    | 0.066                             | -                                 |
| 2018/09/11 13:00 | 0.0065           | 0.53    | 0.038                    | 0.022                             | 0.008                             |
| 2018/09/11 13:10 | 0.0078           | 0.50    | 0.038                    | 0.023                             | 0.004                             |
| 2018/09/11 13:20 | 0.0124           | 0.46    | 0.047                    | 0.027                             | 0.008                             |
| 2018/09/11 13:40 | 0.0163           | 0.37    | 0.051                    | 0.034                             | 0.014                             |
| 2018/09/11 13:50 | 0.0228           | 0.33    | 0.054                    | 0.036                             | 0.010                             |

|                  |        |      |       |       |       |
|------------------|--------|------|-------|-------|-------|
| 2018/09/11 14:00 | 0.0260 | 0.28 | 0.070 | 0.053 | 0.012 |
| 2018/09/11 14:10 | 0.0345 | 0.23 | 0.071 | 0.053 | 0.031 |
| 2018/09/11 14:20 | 0.0449 | 0.18 | 0.070 | 0.060 | 0.037 |
| 2018/09/11 14:30 | 0.0585 | 0.14 | 0.078 | 0.077 | -     |

234

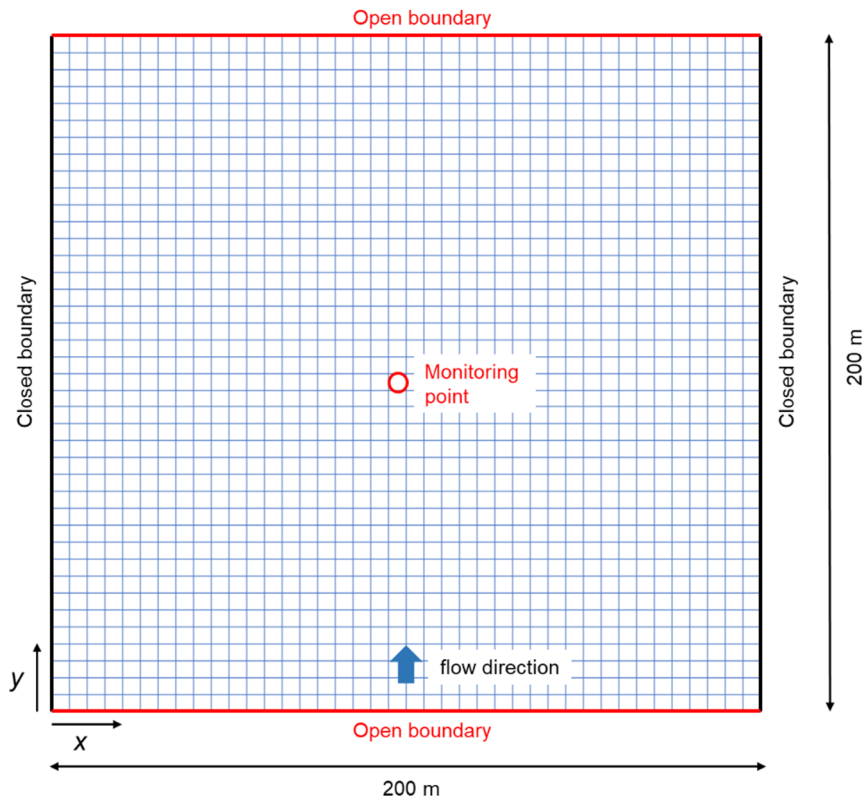

235

236 Figure S2. Model grid (40 × 40 with 5 m horizontal resolution) used for testing the model  
 237 against laboratory-based and field-based studies. The red circle indicates the location of the  
 238 monitoring point at which the simulated flow variables were compared with the measured data.

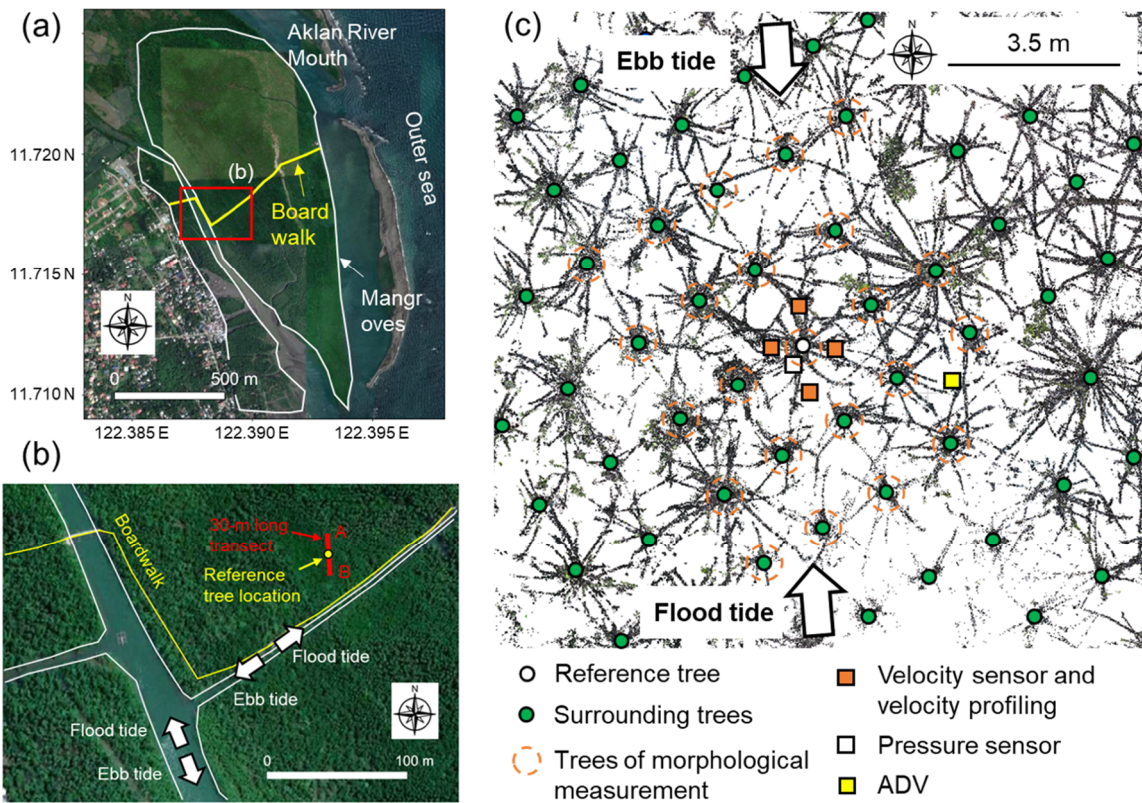

239

240 Figure S3. (a) Satellite image (© Google Earth) of the study site of Yoshikai et al. (2022a) –  
 241 Bakhawan Ecopark (red box indicates the area of panel “b”), (b) locations of transect A–B  
 242 across which the water level gradient was measured together with the hydrodynamic  
 243 parameters around the reference tree (the satellite image is from © Google Earth), (c) top view  
 244 of LiDAR point clouds around the reference tree with information on the locations of trees  
 245 whose morphological structures were measured, where velocity profiling was conducted, and  
 246 where sensors were deployed (velocity sensor: electromagnetic velocity meter deployed near  
 247 the bottom; ADV: Acoustic Doppler Velocimeter deployed to estimate the bed shear stress). It  
 248 has been shown in Yoshikai et al. (2022a) that the average of the velocity measured at the  
 249 four locations represents well the spatially-averaged values. The point clouds shown were  
 250 cropped at heights between 0.1–1.7 m for better visualization of the root systems. Figures are  
 251 modified from Yoshikai et al. (2022a).

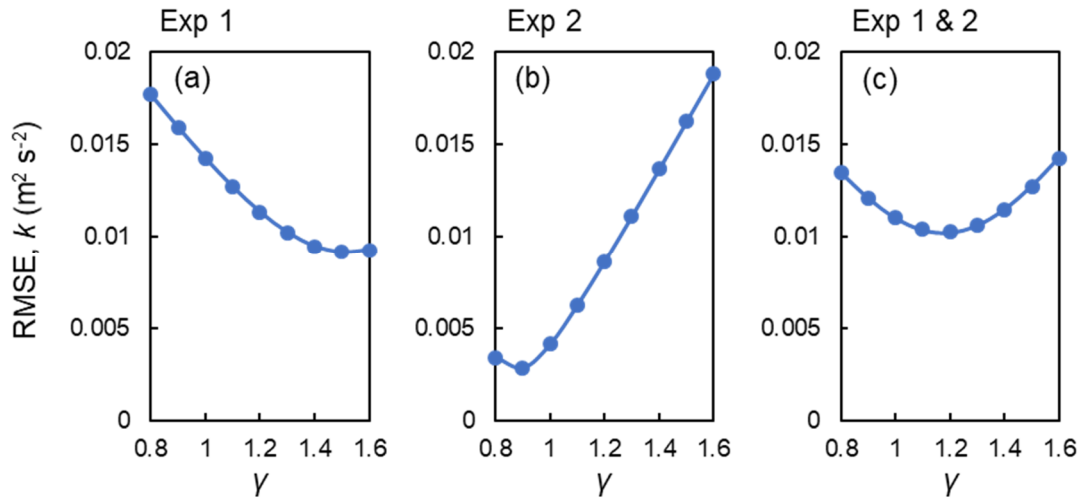

252

253 Figure S4. Root mean square error (RMSE) of modeled turbulent kinetic energy ( $k$ ) against  
 254 the measured data in (a) Exp 1, (b) Exp2, and (c) both Exp 1 and 2 of the flume experiment,  
 255 by varying the value of scale coefficient ( $\gamma$ ), for which the computation of the predicted value  
 256 at the height of the measurement point was obtained by the interpolation of  $k$  computed at  
 257 adjacent vertical layers.

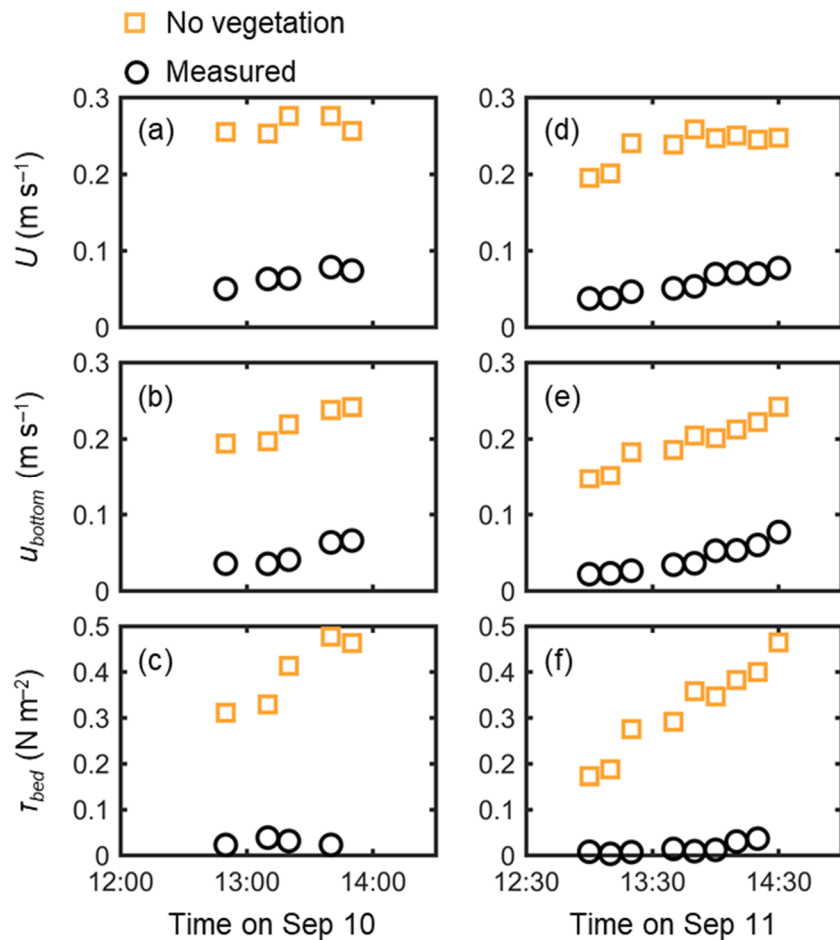

258

259 Figure S5. Time-series of measured and predicted (a, d) cross-sectional mean velocity ( $U$ ),  
 260 (b, e) (spatially averaged) velocity at  $z = 0.05$  m, and (c, f) bed shear stress ( $\tau_{bed}$ ) during the  
 261 two-days measurement in Bakhawan Ecopark. The measured values are from Yoshikai et al.  
 262 (2022a) and the predicted values are obtained through the COAWST without imposing  
 263 vegetation drag (no vegetation).

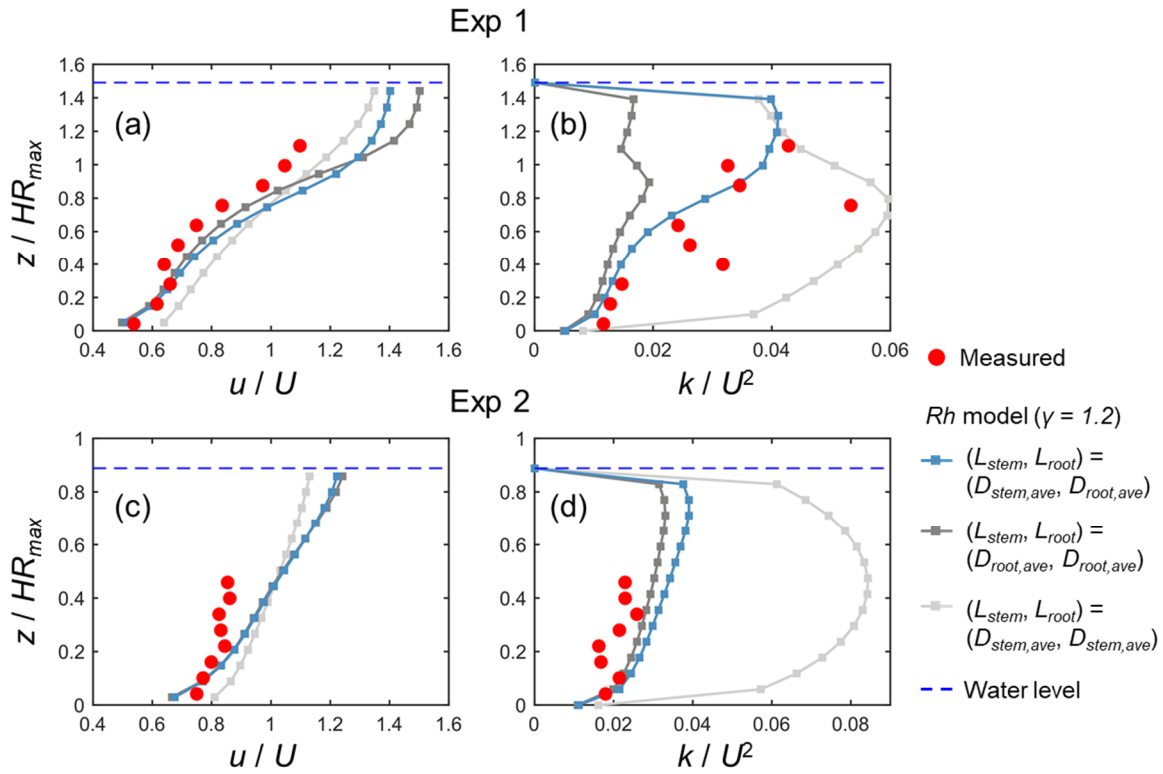

264  
 265 Figure S6. Comparison of the vertical profiles of (temporally and spatially averaged) velocity  
 266 ( $u$ ) and turbulent kinetic energy ( $k$ ) normalized by the cross-sectional mean velocity ( $U$ )  
 267 measured by Maza et al. (2017) and predicted by the COAWST using the  $Rh$  model with  
 268 different length-scales of stem- and root-generated wakes ( $L_{stem}$  and  $L_{root}$ , respectively) defined  
 269 – blue markers:  $L_{stem}$  and  $L_{root}$  set to the stem diameter ( $D_{stem,ave}$ ) and root diameter ( $D_{root,ave}$ ),  
 270 respectively; dark-gray markers:  $L_{stem}$  and  $L_{root}$  both set to  $D_{root,ave}$ ; light-gray markers:  $L_{stem}$  and  
 271  $L_{root}$  both set to  $D_{stem,ave}$ . The scale coefficient ( $\gamma$ ) was set to 1.2 for all the cases.

272

273

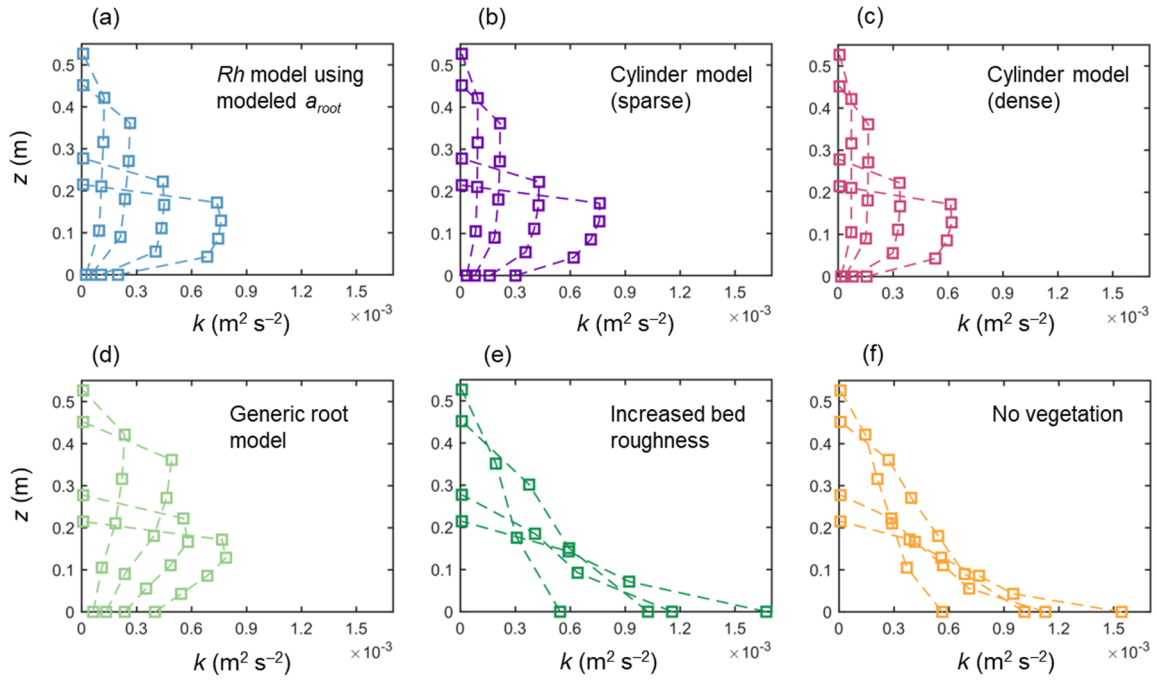

274

275 Figure S7. Vertical profiles of turbulent kinetic energy ( $k$ ) predicted by the COAWST employing  
 276 (a)  $Rh$  model using modeled root projected area density profile ( $a_{root}$ ), (b) cylinder model with  
 277 sparse and (c) dense arrays, (d) generic root model, (e) increased bed roughness as an  
 278 approximation of vegetation drag, and (f) without imposing vegetation drag (no vegetation) for  
 279 some tidal phases corresponding to the ones shown in Fig. 5.



## 280 References

- 281 Baptist, M. J., Babovic, V., Rodríguez Uthurburu, J., Keijzer, M., Uittenbogaard, R. E., Mynett,  
282 A., and Verwey, A.: On inducing equations for vegetation resistance. *Journal of*  
283 *Hydraulic Research*, 45(4), 435–450. <https://doi.org/10.1080/00221686.2007.9521778>,  
284 2007.
- 285 Beudin, A., Kalra, T. S., Ganju, N. K., and Warner, J. C.: Development of a coupled wave-  
286 flow-vegetation interaction model. *Computers & Geosciences*, 100, 76–86.  
287 <https://doi.org/10.1016/j.cageo.2016.12.010>, 2017.
- 288 Crompton, O., Katul, G. G., and Thompson, S.: Resistance formulations in shallow overland  
289 flow along a hillslope covered with patchy vegetation. *Water Resources Research*, 56,  
290 e2020WR027194. <https://doi.org/10.1029/2020WR027194>, 2020.
- 291 Defina, A. and Bixio, A. C.: Mean flow and turbulence in vegetated open channel flow. *Water*  
292 *Resources Research*, 41(7). <https://doi.org/10.1029/2004WR003475>, 2005.
- 293 King, A. T., Tinoco, R. O., and Cowen, E. A.: A  $k-\epsilon$  turbulence model based on the scales of  
294 vertical shear and stem wakes valid for emergent and submerged vegetated flows.  
295 *Journal of Fluid Mechanics*, 701, 1–39. <https://doi.org/10.1017/jfm.2012.113>, 2012.
- 296 Lentz, S. J., Davis, K. A., Churchill, J. H., and DeCarlo, T. M.: Coral reef drag coefficients-  
297 water depth dependence. *Journal of Physical Oceanography*, 47(5), 1061–1075.  
298 <https://doi.org/10.1175/jpo-d-16-0248.1>, 2017.
- 299 Liu, Z., Chen, Y., Wu, Y., Wang, W., and Li, L.: Simulation of exchange flow between open  
300 water and floating vegetation using a modified RNG  $k-\epsilon$  turbulence model. *Environ*  
301 *Fluid Mech* 17, 355–372. <https://doi.org/10.1007/s10652-016-9489-5>, 2017.
- 302 López, F. and García, M. H.: Mean flow and turbulence structure of open-channel flow through  
303 non-emergent vegetation. *Journal of Hydraulic Engineering*, 127(5), 392–402.  
304 [https://doi.org/10.1061/\(ASCE\)0733-9429\(2001\)127:5\(392\)](https://doi.org/10.1061/(ASCE)0733-9429(2001)127:5(392)), 2001.
- 305 Nepf, H. M.: Flow and transport in regions with aquatic vegetation. *Annual review of fluid*  
306 *mechanics*, 44, 123–142. <https://doi.org/10.1146/annurev-fluid-120710-101048>, 2012.
- 307 Suwa, R., Rollon, R., Sharma, S., Yoshikai, M., Albano, G. M. G., Ono, K., Adi, N. S., Ati, R.  
308 N. A., Kusumaningtyas, M. A., Kepel, T. L., Maliao, R. J., Primavera-Tirol, Y. H., Blanco,  
309 A. C., and Nadaoka, K.: Mangrove biomass estimation using canopy height and wood  
310 density in the South East and East Asian regions. *Estur. Coast. Shelf S.*, 248, 106937,  
311 2021.

312 Tanino, Y. and Nepf, H. M.: Lateral dispersion in random cylinder arrays at high Reynolds  
313 number. *Journal of Fluid Mechanics*, 600, 339–371.  
314 <https://doi.org/10.1017/S0022112008000505>, 2008.

315 Warner, J. C., Sherwood, C. R., Signell, R. P., Harris, C. K., and Arango, H. G.: Development  
316 of a three-dimensional, regional, coupled wave, current, and sediment-transport model.  
317 *Computers & geosciences*, 34(10), 1284–1306.  
318 <https://doi.org/10.1016/j.cageo.2008.02.012>, 2008.

319 Xie, D., Schwarz, C., Brückner, M. Z., Kleinhans, M. G., Urrego, D. H., Zhou, Z., and Van  
320 Maanen, B.: Mangrove diversity loss under sea-level rise triggered by bio-  
321 morphodynamic feedbacks and anthropogenic pressures. *Environmental Research*  
322 *Letters*, 15(11), 114033. <https://doi.org/10.1088/1748-9326/abc122>, 2020.

323 Yoshikai, M., Nakamura, T., Suwa, R., Argamosa, R., Okamoto, T., Rollon, R., Basina, R.,  
324 Primavera-Tirol, Y. H., Blanco, A. C., Adi, N. S., and Nadaoka, K.: Scaling relations  
325 and substrate conditions controlling the complexity of *Rhizophora* prop root system.  
326 *Estuar. Coast. Shelf S.*, 248, 107014, 2021.

327 Yoshikai, M., Nakamura, T., Bautista, D. M., Herrera, E. C., Baloloy, A., Suwa, R., Basina, R.,  
328 Primavera-Tirol, Y. H., Blanco, A.C., and Nadaoka, K.: Field measurement and  
329 prediction of drag in a planted *Rhizophora* mangrove forest. *Journal of Geophysical*  
330 *Research: Oceans*, 127, e2021JC018320. <https://doi.org/10.1029/2021JC018320>,  
331 2022a.

332 Yoshikai, M., Nakamura, T., Suwa, R., Sharma, S., Rollon, R., Yasuoka, J., Egawa, R., and  
333 Nadaoka, K.: Predicting mangrove forest dynamics across a soil salinity gradient using  
334 an individual-based vegetation model linked with plant hydraulics. *Biogeosciences*,  
335 19(6), 1813–1832. <https://doi.org/10.5194/bg-19-1813-2022>, 2022b.

336 Zhang, K., Liu, H., Li, Y., Xu, H., Shen, J., Rhome, J., and Smith III, T. J.: The role of  
337 mangroves in attenuating storm surges. *Estuarine, Coastal and Shelf Science*, 102,  
338 11–23. <https://doi.org/10.1016/j.ecss.2012.02.021>, 2012.
